1 **Global metabolomic characterizations of *Microcystis* spp.**  
2 **highlights clonal diversity in natural bloom-forming populations**  
3 **and expands metabolite structural diversity**

4  
5 Séverine Le Manach<sup>1</sup>, Charlotte Duval<sup>1</sup>, Arul Marie<sup>1</sup>, Chakib Djediat<sup>1</sup>, Arnaud Catherine<sup>1</sup>,  
6 Marc Edery<sup>1</sup>, Cécile Bernard<sup>1</sup>, Benjamin Marie<sup>1,\*</sup>

7  
8 <sup>1</sup>UMR 7245 MNHN/CNRS Molécules de Communication et Adaptation des Micro-organismes, Muséum  
9 National d'Histoire Naturelle, 75005 Paris, France.

10  
11 [slemanach@mnhn.fr](mailto:slemanach@mnhn.fr); [cduval@mnhn.fr](mailto:cduval@mnhn.fr); [armarie@mnhn.fr](mailto:armarie@mnhn.fr); [djediat@mnhn.fr](mailto:djediat@mnhn.fr); [arnocat@mnhn.fr](mailto:arnocat@mnhn.fr);  
12 [medery@mnhn.fr](mailto:medery@mnhn.fr); [cbernard@mnhn.fr](mailto:cbernard@mnhn.fr); [bmarie@mnhn.fr](mailto:bmarie@mnhn.fr)

13  
14 \* to whom correspondence should be addressed at [bmarie@mnhn.fr](mailto:bmarie@mnhn.fr)

15  
16 **Abstract**

17 Cyanobacteria are photosynthetic prokaryotes that are able to synthesize a wide range of  
18 secondary metabolites exhibiting noticeable bioactivity, comprising toxicity. *Microcystis*  
19 represents one of the most common cyanobacteria taxa constituting the intensive blooms that  
20 arise nowadays in freshwater ecosystems worldwide. They produce numerous cyanotoxins  
21 (toxic metabolites), which are potentially harmful to Human health and aquatic organisms. In  
22 order to better understand the variations in cyanotoxins production between clones of the  
23 *Microcystis*, we investigate the diversity of several strains isolated from the same blooms,  
24 from different populations in various geographical areas.

25 Twenty-four clonal strains were compared by genotyping with 16S-ITS fragment sequencing  
26 and metabolites chemotyping using LC ESI-qTOF mass spectrometry. While, genotyping can  
27 only discriminate between the different species, the global metabolomes reveal clear  
28 discriminant molecular profiles between strains. These profiles can be clustered primarily  
29 according to their global metabolite content, then to their genotype, and finally to their  
30 sampling localities. A global molecular network of all metabolites highlights the production  
31 of a wide set of chemically diverse metabolites, comprising only few microcystins, but many  
32 aeruginosins, cyanopeptolins and microginins, along with a large set of unknown molecules.  
33 They represent the molecular biodiversity that still remains to be investigated and  
34 characterized at their structure as well as at their potential bioactivity or toxicity levels.

35  
36  
37 **Keywords:** cyanobacteria blooms, secondary metabolites, chemiodiversity, mass  
38 spectrometry, aquatic environment.

## 39 1. Introduction

40 The frequency and the intensity of cyanobacteria blooms occurring in continental aquatic  
41 ecosystems have increased since last decades, due to climate and anthropogenic changes  
42 (Carey *et al.*, 2012; Sukenik *et al.*, 2015; Paerl, 2018). These massive cyanobacteria blooms  
43 threaten the functioning of aquatic ecosystems through various processes, including an  
44 alteration of the trophic network, a decrease of the light penetration within the water column,  
45 the decrease of available dissolved oxygen, and also the production of various secondary  
46 metabolites potentially toxic for the organisms living in these ecosystems (Carmichael 2008).  
47 Indeed, various cyanobacteria genera are able to synthesize a wide range of secondary  
48 metabolites (Welker *et al.*, 2012; Shih *et al.*, 2013), with noticeable bioactivity, comprising  
49 high toxicity, and which are potentially harmful to Human health and aquatic organisms  
50 (Codd *et al.*, 2005; Pearson *et al.*, 2010). These metabolites are also believed to be noticeably  
51 involved in the capability of these organisms to proliferate in various environments  
52 (Guljamow *et al.*, 2017).

53  
54 One of the most pervasive bloom-forming cyanobacteria in worldwide freshwater ecosystems  
55 is *Microcystis*, as it is now encountered and nowadays proliferate locally in more than 108  
56 countries and on all continents (Sejnovhova and Marsalek, 2012; Harke *et al.*, 2016; Ma *et al.*,  
57 2016). Previous documentations also noted that *Microcystis* would occurred during previous  
58 decades in only less than 30 countries (Zurawell *et al.*, 2005), suggesting that *Microcystis* is  
59 currently proliferating and dominating phytoplankton communities in a wide range of  
60 freshwater ecosystems in both temperate and tropical climates. In temperate systems, this  
61 organism overwinters in the benthos and during the summer rises to the epilimnion where it  
62 can accumulate to form blooms and scums on the water surface (Harke *et al.*, 2016).

63 Some important features of *Microcystis*, such as buoyancy regulation, storage strategy at the  
64 bottom of water column, phosphate (P) and nitrogen (N) uptake capacities and resistance to  
65 zooplankton grazing, favour its worldwide spread (Pearl *et al.*, 2011). Indeed, *Microcystis*  
66 presents competitive advantages over other cyanobacteria or microalgae in response to  
67 nutrient limitation. In addition, many *Microcystis* strains can produce a multitude of bioactive  
68 secondary metabolites, including the potent hepatotoxin microcystins (MCs), and thus  
69 persistent blooms pose a risk to those who use impaired water resources for drinking water  
70 supplies, recreational activities, and fisheries (Codd 2005). Beyond MCs, other toxic  
71 compounds or potential secondary metabolites produced by *Microcystis* have also been  
72 reported as chemical warfare against grazing of herbivores (Harke *et al.*, 2017).

73 So far, eleven gene clusters encoding non-ribosomal peptide synthase (NRPS) and/or  
74 polyketide synthase (PKS), and two ribosomal ones predicted to be involved in the  
75 biosynthesis of secondary metabolites, were found among ten *Microcystis* genomes (Humbert  
76 *et al.*, 2013). Seven of these clusters encode enzymes for the biosynthesis of known  
77 metabolites (microcystins, aeruginosins, cyanopeptolins, microginins, anabaenopeptins,  
78 cyanobactins and microviridins), whereas the six remaining clusters encode enzymes for the  
79 biosynthesis of still unidentified products. However, the relationship between cyanobacterial  
80 biomass and metabolite concentrations in the environment appears neither systematic nor  
81 linear (Briand *et al.* 2002; Liu *et al.*, 2016). Indeed, the production of metabolites, such as  
82 microcystins, by *Microcystis* blooms, depends not only on cyanobacterial biomass, but also  
83 on the ratio between potentially producing and non-producing genotypes within the  
84 population (Via-Ordorika *et al.* 2004).

85  
86 Despite significant advances in description of the biosynthetic pathways involved in  
87 cyanobacterial metabolite production (Dittmann *et al.*, 2015; Wang *et al.*, 2014), the natural  
88 functions and the ecological roles played by these molecules are still not well understood

89 (Holland *et al.*, 2013; Zak and Kosakowska, 2016). The biosynthesis of cyanobacterial  
90 secondary metabolites consumes a great deal of metabolic energy inducing a significant cost  
91 for the cell (Briand *et al.*, 2012). However, natural environment are colonized by various  
92 clones exhibiting different corteges of metabolites synthesized (Briand *et al.*, 2009). It has  
93 been proposed that the environment it self could favour the selection of *Microcystis* clones  
94 that present the metabolite composition that is the more adapted to face the local ecological  
95 conditions (Welker *et al.*, 2007; Martins *et al.*, 2009; Agha and Quesada 2014).

96  
97 Recently, the development of modern approach on mass spectrometry data treatment by  
98 molecular networking tools gave us new opportunity for the description of the occurrence and  
99 the diversity of cyanobacterial metabolites (Yang *et al.*, 2013; Briand *et al.*, 2016a). With the  
100 aim of contributing to better understand the variations in metabolite production, such as  
101 microcystins (MCs), between clones of cyanobacterial blooms from different localities, we  
102 investigate in the present study the clonal diversity of several *Microcystis* strains isolated  
103 from different freshwater bloom-forming populations from various geographical area using  
104 such innovative approach based on high resolution mass spectrometry analyses.

## 105 106 107 **2. Results**

### 108 *2.1. Morphologic and phylogenetic characterization*

109 In order to elucidate the genetic relation between the 24 *Microcystis* strains we have  
110 investigated here (Table 1), we performed a first analysis of 1380-pb 16S fragment indicates  
111 that all *Microcystis* morpho-species are grouped in a unique and homogenous group, due to  
112 high sequence conservation on this fragments (not shown). Using 16S-23S ITS fragments  
113 (above 600-bp long), the phylogenetic analysis shows a clear distinction between *M.*  
114 *aeruginosa* and *M. wessenbergii/viridis* morpho-species (Figure 2). Interestingly, the different  
115 strains presenting the MC synthesis gene *mcyA* (indicated in red) appear not clustered on the  
116 phylogenetic representation, suggesting that the ability of producing MC would be a character  
117 disconnected from the phylogeny of strains.

### 118 119 *2.2. Global metabolome analyses*

120 The metabolomic shotgun analyses reveal discriminant metabolic profiles between strains  
121 collected from both different or identical sites. Whereas previous works had highlighted the  
122 metabolic diversity of some *Microcystis* strains based on few identified metabolites or  
123 cyanotoxines (Martins *et al.*, 2009; Welker *et al.*, 2004; Welker *et al.*, 2006), we present here  
124 a global picture of the metabolome of each strain. Using HR ESI-Qq-TOF with the 24  
125 *Microcystis* strain extracts, 2051 distinct mass ions in a range of 400–2000 Da were recorded  
126 (*i.e.* with a signal to noise ratio in excess of 6, and respective relative peak intensity superior  
127 to 5000-count in at least one sample threshold), each strain exhibiting between above 100 and  
128 300 different main metabolites of reliable (>10 000 counts) respective intensity (Figure 3;  
129 supplementary figure S1). A hierarchical clustering was performed according to Bray-Curtis  
130 indexes calculated between all 24 strains according to the relative intensity of each analytes in  
131 each strains. This representation (Figure 3) clearly shows a clustering of all strains producing  
132 MCs (*mcyA*+/*MC*+, in red), on one side, and of other strains not producing MCs (*mcyA*-/*MC*-,  
133 in grey). This clustering shows that some strains from the same environment exhibits very  
134 similar metabolite fingerprints (*e.g.* PMC 728.11 and 729.11), when other from the same  
135 localities exhibits much more dissimilar metabolite fingerprints (*e.g.* PMC 728.11 and  
136 727.11), being more similar with strains from faraway locations (*e.g.* PMC 729.11 and  
137 816.112). Additional non-metric multidimensional scaling (nMDS) and PERMANOVA  
138 analyses based on Bray-Curtis index indicates that the ability to produce MC seems to be the

139 first main driver of the global metabolome of *Microcystis* molecular fingerprinting, the  
140 species and the localities representing less explicative parameters (supplementary figure 2).

141

### 142 2.3. Metabolite molecular network

143 A molecular network based on the global fragmentation pattern profile of all observed  
144 metabolites in the 24 strains investigated. The GNPS algorithm automatically compares all  
145 MS/MS spectra by aligning them one by one, grouping identical molecules (presenting  
146 identical mass and fragmentation pattern) and assigning cosine score ranking from 0 to 1 to  
147 each alignment, allowing network reconstruction of the link between each molecule according  
148 to the cosine score links between all molecules with a cosine score significance threshold set  
149 to 0.6. The resulting network constituted of a total of 925 nodes from the 1374 different  
150 analytes which MS/MS data have been obtained (supplementary figure 1), represents a  
151 starting point for the annotation of unidentified metabolites, according to respectively  
152 identified molecules within the different clusters, and to their occurrence in *M. aeruginosa*  
153 and/or *M. wessenbergii/viridis* strains (Figure 4).

154

155 The *Microcystis* strains produce a wide set of chemically diverse metabolites, which principal  
156 clusters can attemptedly been identified thanks to analytical standards available for some  
157 cyanobacterial secondary metabolite family, or to match with components from libraries  
158 publically available from GNPS platform, such as HMDB, NIST14 or METLIN. Considering  
159 the strains producing these analytes, and above a quarter of them appears to be specific of *M.*  
160 *wessenbergii/viridis* strains, when more than half are specific of *M. aeruginosa*, the rest being  
161 observed on both species.

162 The grouping of different analytes in the same molecular cluster is based on similarity of their  
163 fragmentation patterns, each cluster being potentially specific of the structure of chemical  
164 families. Among those larger clusters, we were thus able to annotate some of them, being  
165 constituted by ions of small metabolites, such as di-peptides and small peptides (1 cluster in A  
166 area), of microcystins (3 clusters in C area), of anabaenopeptins (3 clusters in D area), of  
167 aeruginosins (2 clusters in E area), of aerucyclamides (3 clusters in F area), of microginins (2  
168 clusters in H area) and cyanopeptolons (6 clusters in I area), together with various clusters of  
169 unknown components, comprising non-identified ions (for example 2 clusters in B area). Less  
170 than a third of the metabolites observed here could be annotated, thanks to their respective  
171 mass and fragmentation patterns when compare to those of the above 800 metabolite of  
172 freshwater cyanobacteria described so far and listed in supplementary table 1. These un-  
173 identified ions that belong to annotated clusters are then considered as potential new  
174 analogues of their respective molecular family.

175

### 176 2.4. Known cyanobacteria secondary metabolite clusters

#### 177 *Microcystins*

178 Microcystins are cyclic heptapeptides that have been firstly described from *M. aeruginosa*.  
179 Above 250 different variants have been described so far (Catherine *et al.*, 2017), 138 being  
180 references in our database for cyanobacterial metabolite (supplementary table 1). They are  
181 characterized by the presence of a non-proteinaceous amino acid in position 5 (Adda), two  
182 amino acid derived from Asp and Glu in position 3 and 6, respectively, and 2 very variable  
183 positions (2 and 4), that serve as reference to the name of the variant. Three microcystin  
184 clusters were highlighted according to the presence of 5 standard molecules (Dmet(Asp3)-  
185 MC-LR, MC-LR, MC-YR, MC-LA and MC-HtyR) analyses in parallel of the 24 *Microcystis*  
186 extracts with the same protocol (Figure 5). Other components of these clusters correspond to  
187 ions presenting a match of their respective mass with those of other MC variants previously  
188 described (supplementary table 1), or for ¼ of them to potential new analogues. Observation



189 of their respective MS/MS spectra shows that they present distinct but similar fragmentation  
190 patterns of other known MC variants.

191

### 192 *Aeruginosins*

193 Aeruginosins constitute a linear tetrapeptide family that have been firstly described from *M.*  
194 *aeruginosa*, and that represent above 94 different variants that have been described so far  
195 (Supplementary table 1). Their MS/MS fragmentation patterns are often characterized by the  
196 presence of a Choi fragment (immonium with 140.109 *m/z*) and other recurrent fragments  
197 from Hpla or Pla. Their composition is rather variable and the component of this family  
198 exhibit masses comprised between 430 and 900 Da (Welker and von Döhren 2006). The  
199 molecular network obtained from the 24 *Microcystis* strains exhibits 2 aeruginosin clusters  
200 (Figure 6) that were highlighted by to the presence of 2 standard molecules (aeruginosin 98A  
201 and 98B). Other components of these clusters correspond to ions presenting a mass match  
202 with other variants of aeruginosin previously described (supplementary table 1), or for ½ of  
203 all this compounds to potential new analogues, that aim at being characterized now, in further  
204 dedicated works.

205

### 206 *Anabaenopeptins*

207 Anabaenopeptins constitutes a very diverse family of cyclic hexapeptides that have been  
208 described from now from *Microcystis*, *Planktothrix*, *Anabaena*, *Aphanizomenon* and *Nostoc*.  
209 Above 75 different variants have been described so far (supplementary table 1). They are  
210 characterized by the presence of a peptide bound between the D-Lys placed in position 2, and  
211 the carboxylic group of the amino acid placed in position 6. Except fro the D-Lys (position 2)  
212 all other positions are variable allowing a large structural diversity of the family which  
213 molecules exhibit masses between 750 and 950 Da (Welker and von Döhren 2006). Three  
214 anabaenopeptin clusters were highlighted here (Figure 7) according to the presence of 4  
215 standard molecules (anabaenopeptin A, B, E and oscyllamide Y). Other components of these  
216 clusters correspond to ions presenting a mass with other variants previously described  
217 (supplementary table 1), or for ½ of all of them to compounds that very likely correspond to  
218 potentially new analogues. All observed anabaenopeptin compounds are from *M. aeruginosa*  
219 strains suggesting that *M. wessenbergii/viridis* strains are not capable of the synthesis of  
220 molecules of this family and may not possess the corresponding *apt* synthetic gene cluster.

221

### 222 *Cyanopeptolins*

223 Cyanopeptolins belong to a large family of cyclic depsipeptides, that also comprises  
224 micropeptins and aeruginopeptins, representing above 170 variants. Those molecules are  
225 characterized by the presence of the non-proteinaceous amino acid Ahp and by a six-aa long  
226 ring formed by an ester bound between Thr or Pro in position 1 and the carboxylic group of  
227 the N-terminal amino acid (position 6). The lateral chain can exhibit a variable length and is  
228 constituted by one or two amino acid and potentially linked to an aliphatic fatty acid (Welker  
229 and von Döhren 2006). In the molecular network, 2 analytes of the cyanopeptolin clusters  
230 correspond to 2 standard molecules (cyanopeptolin B and D), and various other components  
231 correspond to ions presenting a mass that corresponds to different variants previously  
232 described (supplementary table 1), allowing us to annotate them as cyanopeptolin specific  
233 clusters (Figure 8). Above ½ of the analytes present in these clusters correspond to unknown  
234 compounds constituting potential new analogues. We observe here that all these  
235 cyanopeptolin compounds are from *M. aeruginosa* strains suggesting that *M.*  
236 *wessenbergii/viridis* strains are not capable of the synthesis of molecules of this family and  
237 may not possess the corresponding *mcn/oci* synthetic gene cluster.

238

## 239 *Microginins*

240 Microginins are linear pentapeptides (the length of the sequence varying from 4 to 6 amino  
241 acids) initially identified from *Microcystis aeruginosa*, then from other species and in other  
242 genera such as *Planktothrix* (Welker and von Döhren 2006). These molecules are composed  
243 by a characteristic non-proteinaceous amino acid Ahda in N-terminy, the other position  
244 bearing variable amino acid structures, comprising Tyr, Pro Hty, Trp, Ala, Ser.... Relatively  
245 few microginin variants (less than 40) have been described so far (supplementary table 1).  
246 According to the molecular network, above two third of the analytes present in the two  
247 microginin clusters correspond to unknown compounds constituting potential new analogues,  
248 when six standard molecules could have been retrieved in our analysis (microginin 757, 711,  
249 BN578, FR1, FR2 and SD755).

250

## 251 *Aerucyclamides/cyanobactins*

252 The name “cyanobactin” has been proposed in order to grouped all cyclic peptides containing  
253 proteinogenous amino acids that are post-translationally modified in heterocyclic amino acids  
254 and isoprenoid derivatives (Sivonen *et al.*, 2010). It comprises various cyclamides (cyclic  
255 peptides of 6 amino acids) that have been identified in freshwater cyanobacteria such as  
256 *Microcystis*, *Planktothrix* and *Nostoc*, but also in symbiotic cyanobacteria species. More than  
257 30 variants have been described so far, but more molecules could be related to the family that  
258 represent a very large variety of chemical structures (Martins and Vasconcelos 2015). Three  
259 different cyanobactin clusters were observed in the molecular network, comprising three  
260 aerucyclamide standard molecules (aerucyclamide A, B and C) that were identified by GNPS  
261 tool. Above  $\frac{3}{4}$  of the analytes from these clusters representing potential new analogues, that  
262 need to be characterized by further dedicated analyses.

263

## 264 *2.5. Uncharacterized cyanobacteria metabolite clusters*

### 265 *Potential primary metabolite clusters?*

266 Various other important clusters comprising few tens of analytes, that are mostly present in  
267 high amount (higher peak intensity showed by larger circles) in a large set of strains from  
268 both *M. aeruginosa* and *M. wessenbergii/viridis* (Figure 4). These compounds present  
269 molecular masses comprised between 300 and 500 Da, suggesting that it could correspond to  
270 relatively small compounds (supplementary figure 3). We can speculate, that these  
271 components could correspond to primary metabolites used for the general metabolism of  
272 various strains, however additional effort should be made in order to propose annotations for  
273 these ubiquitous molecules present in these specific clusters. Interestingly, the compounds  
274 from these latter cluster present high fragmentation patterns, illustrated with various similarity  
275 and high cosine score (numerous and tick links between nodes), suggesting they should  
276 present very similar structures.

277

### 278 *Uncharacterized secondary metabolite clusters?*

279 Interestingly, other clusters correspond to unknown components, some of them being only  
280 synthesis by *M. wessenbergii/viridis* as exemplified in supplementary figures 4 and 5. These  
281 compounds which molecular mass are relatively high (between 950 and 1300 Da) might  
282 correspond to specific secondary metabolite families, belonging to other known family of  
283 cyanobacterial metabolite, but poorly characterized, such as microviridins and/or  
284 aeruginoguanidins, for which only few variants have been characterized and no standard  
285 molecules are available so far. Alternatively, they may correspond to completely new family  
286 of metabolites, which existence have been suggested by the observation of orphan NRPS/PKS  
287 clusters within various *Microcystis* genomes (Humbert *et al.*, 2013).

288

289

### 290 **3. Discussion**

#### 291 *3.1. Phylogeny and biogeography of Microcystis strains*

292 The classification of species in genus *Microcystis* is still under large revision. Traditional  
293 morphological criteria including colony form, mucilage structure, cell diameter, the density  
294 and organization of cells within the colony, pigment content and life cycles are used for  
295 morphospecies recognition (Komarek 2016). Five dominant morphospecies (*M. aeruginosa*,  
296 *M. ichthyoblabe*, *M. viridis*, *M. novacekii*, *M. wesenbergii*) of the genus *Microcystis* were  
297 suggested by Ostuka *et al.* (2001). However, with the development of molecular and  
298 biochemical markers, some contradictory results of *Microcystis* taxonomy have been found.  
299 For instance, 16S rRNA analysis revealed no differences among the morpho-species (Otsuka  
300 *et al.*, 2000). In consideration of both morphological and molecular markers, it has been  
301 suggested to classify *Microcystis* into three groups: the small cell-size group composed of *M.*  
302 *ichthyoblabe* and *M. flos-aquae*, the middle cell-size group based on *M. aeruginosa* (incl. *M.*  
303 *novacekii*) and the large cell-size group represented by *M. wesenbergii* (Whitton, 2012).

304 According to your phylogenetic reconstruction based on 16S-16S/23S ITS fragment that is in  
305 accordance with previous observation (Otsuka *et al.*, 1999), the studied *Microcystis* strains  
306 were roughly divided into two groups; the *M. wesenbergii/viridis* group and the *M.*  
307 *aeruginosa* group, in relation with the relative size of the colonies observed under  
308 microscopes. In addition, the *mcyA*<sup>+</sup> and *mcyA*<sup>-</sup> strains appears broadly disperse on both  
309 group, unspecifically. These observations confirm that the phylogenetic relationship between  
310 different strains within the genus of *Microcystis* do not correspond to the possession of *mcy*  
311 (Tillett *et al.*, 2001). Therefore, the toxic potential, through the MC synthesis, of each strain  
312 should assess regardless of its phylogenetical position.

313

#### 314 *3.2. Biogeography and genetic diversity of Microcystis strains*

315 Despite the very high similarity of *Microcystis* 16S rRNA sequences (>99.5%), low synteny  
316 and large genomic heterogeneity have been retrieved from the investigation of *Microcystis*  
317 genomes, deciphering a large cryptic diversity from various strains collected from different  
318 sites and continents (Humbert *et al.*, 2013). At an other large geographic scale that in our  
319 analysis, genetic comparison of various *Microcystis* strains isolated from different Asian and  
320 European lakes based on 16S-ITS fragments does not show local-specific clustering effect  
321 indicating that the genetic distance between different genotypes from the same lake can be  
322 greater than between strains from very distanced environments (Humbert *et al.*, 2005; Haande  
323 *et al.*, 2007). Our data on the molecular heterogeneity observed by metabolic fingerprinting  
324 between some strains originating from the same site (for example between PMC 810.12 and  
325 PMC 816.12, Champs-sur-Marne, France) also support this hypothesis. The fact that some  
326 *Microcystis* genotypes seem to be distributed worldwide was also previously reported for  
327 bacterioplankton species (Zwart *et al.*, 1998), suggesting that these organisms may possess  
328 peculiar physiological capabilities and/or large dispersal capabilities enabling them to  
329 compete successfully in a wide range of freshwater environments.

330

#### 331 *3.3. MC-producing versus non-MC producing metabolic pattern of Microcystis strains*

332 The metabolome diversity has been also used as molecular characters that can help at the  
333 discrimination of various chemotypes (Ivanizevic *et al.*, 2011), in addition to classical  
334 genotyping approach that sometimes lack of reliable characters for phylogenetic relationship  
335 discrimination. Few analytical methods have been experimented for chemotaxonomic  
336 characterization of cyanobacteria, based for example on fatty acid compositions (Gugger *et*  
337 *al.*, 2002), or more recently on ribosomal protein analysed globally by MALDI-TOF in  
338 *Microcystis aeruginosa* (Sun *et al.*, 2016). Interestingly, this latter chemotaxonomic approach

339 was able to group all the MC-producing strains in two distinct clades when the non MC-  
340 producing strains were segregate in three other distinct clades. In a previous work, Martins  
341 and collaborators (2009) have analysed the metabolite diversity of various *Microcystis*  
342 *aeruginosa* strains originated from Portuguese water supplies using MALDI-TOF MS, and  
343 were able to observe a MC production in almost half of the strains investigated. These  
344 observations also illustrate the fact that MC-producing clones could subsist in various  
345 environments, despite the important energetic cost required for MC gene cluster replication  
346 and the translation of its mega-enzyme complex (Briand *et al.*, 2012). The biological  
347 advantage of producing MCs for some clones still remains an enigma, as the functional role of  
348 MC remaining uncharacterized (Agha and Quesada 2014; Gan *et al.*, 2012).  
349 In a similar manner our molecular fingerprint approach based on global metabolome profiling  
350 using ESI-Qq-TOF discriminate clearly MC-producing strains from others. Taken together,  
351 these observations suggest that shotgun mass spectrometry chemotyping of cyanobacteria  
352 could constitute a promising tool for the characterization of rapid biomarkers aim at the  
353 toxicological assessment of strains isolated from the field. The MC production could  
354 constitute a singular treat, that could constitute on of the key drivers of the global metabolic  
355 diversity of *Microcystis* strains, suggesting that MC could play a keystone function in  
356 cyanobacterial metabolite production. Indeed, it has previously hypothesized according to  
357 metabolomic observation that the character of MCs production could be compensate in strains  
358 not producing MCs by the production of other metabolites, such as aeruginosamines (Martins  
359 *et al.*, 2009) for unknown biological reasons (Briand *et al.*, 2016a; Tonk *et al.*, 2009). Such  
360 secondary metabolic compensatory mechanisms, between and within peptide classes, were  
361 previously suspected for *Microcystis* (Martins *et al.*, 2009) or *Planktothrix* (Tonk *et al.*, 2005)  
362 in response to various growth conditions. However, further investigations with wider  
363 sampling are now required in order to increase the data set that could better help to test such  
364 metabolite functional hypothesis.

### 365 366 3.3. Secondary metabolite diversity within known metabolite families

367 The molecular cluster identified by GNPS approach can be annotated thank to match with  
368 spectral databases or the presence of standard molecules present in the request as additional  
369 samples analysed similarly (Yang *et al.*, 2013). In our hands, the global molecular networks  
370 obtained from the 24 strains MS/MS dataset present various cluster that could have been  
371 annotated accordingly as corresponding to main cyanobacterial metabolite families. We  
372 assumed that the nodes of these clusters which molecular masses is similar to already known  
373 cyanobacterial metabolite very likely correspond to these specific metabolites or alternatively  
374 to isobaric analogues from the same family. In addition, all other nodes from those clusters  
375 that do not correspond to neither standard, nor known analogues, could be considered as new  
376 analogues that may correspond to new putative variants that still have to be investigated.  
377 These observations are in accordance with previous investigation indicating that different  
378 *Microcystis* strains can produce such various known and unknown secondary metabolites,  
379 according to both genetic or targeted metabolome analyses (Humbert *et al.*, 2013; Martins *et*  
380 *al.*, 2009; Welker *et al.*, 2004; Welker *et al.*, 2006). Surprisingly, rare metabolite family such  
381 as aeruginosamine are not successfully detected in our analysis. Indeed, only few molecules  
382 belonging to this family have been yet described (supp. Table 1) and their MS/MS  
383 fragmentation pattern has not been deeply characterized. In addition, the lack of available  
384 standard molecule and of knowledge on their respective fragmentation patterns makes  
385 aeruginosamines challenging to be simply annotate with our GNPS approach.

386  
387 However, our analyses reveal the large molecular diversity of *Microcystis* metabolites,  
388 according to the various new variants of both cyanobacterial metabolite families that remain



389 to be characterized. The observation of various uncharacterized cluster also suggest that new  
390 metabolite families are needed to be discovered and described from this taxa, and that further  
391 effort are still required. So far, *Microcystis* represent one of the most studied genera for its  
392 production of various metabolite families. However, the biological functions play by these  
393 molecules remains enigmatic and their overgrowing molecular diversity revealed by global  
394 approach, such as GNPS global metabolomic investigation, constitutes one of the questioning  
395 paradox in the field of evolution and diversity microbiology.

396

### 397 3.4. Unknown metabolite families

398 Although, the strains used in this study were not cultured in stringent axenic conditions, no  
399 noticeable contamination by fungi or heterotroph bacteria could have been detected during the  
400 systematic screening of all strains under light microscope prior to the experiment. In addition,  
401 a previous metabolome analyses in PCC 7806 grown under axenic or non-axenic condition do  
402 not detected any variation in the metabolite produced by the cyanobacteria (Briand *et al.*,  
403 2016b). We assume that the metabolite profiles observed here for the 24 strains are  
404 characteristic of the cyanobacteria them self and that the different metabolite observed in this  
405 study, comprising the unknown metabolite clusters highlighted by the network analysis, are  
406 genuine produced by the cyanobacteria themselves.

407 The non-annotated cluster observed in our GNPS analysis can potentially correspond to novel  
408 variant of known cyanotoxin or to completely new family of cyanobacteria metabolite.  
409 Indeed, Humbert and co-workers (2013) have shown that the genome of ten *Microcystis* strains  
410 exhibits at least three orphan clusters with specific NRPS/PKS signature that are virtually  
411 synthesizing so far undescribed metabolite family. One could speculate that the unknown  
412 clusters observed with GNPS approach can correspond to such novel metabolite family, and  
413 structural elucidation of an expending number of novel metabolites revealed by molecular  
414 networking are currently been performed on various cyanobacteria (Boudreau *et al.*, 2015).

415

416

## 417 4. Conclusions

418 Innovative approaches based on shotgun metabolomic analyses using high resolution mass  
419 spectrometry, as those performs in this study, seems to provide a large panel of information  
420 on cyanobacteria chemical diversity relevant for evolutive, ecological and toxicological  
421 purposes, and represents an interesting and relatively easy-to-perform alternative to genome  
422 sequencing for metabolite and/or toxic potential descriptions of cyanobacterial strains.

423 Global molecular network also allows to depict the chemical diversity of the *Microcystis*  
424 metabolome in an interesting manner, with comparison with classical natural product  
425 chemistry approaches described so far, as in our hand above half of the analytes described in  
426 the global molecular network seems to correspond to metabolites belonging to potentially new  
427 variants of known families or even to family members (presenting original fragmentation  
428 patterns) that are still to be described at the structural and toxicological/bioactivity levels.

429

430

## 431 5. Material and methods

### 432 6.1. Sampling, isolation and cultivation of *Microcystis* monoclonal strains

433 The study was carried out with 24 monoclonal non-axenic cultures of *Microcystis* spp.  
434 maintained at 25°C in 15-mL vessels with Z8 media in the PMC (Paris Museum Collection)  
435 of living cyanobacteria ([http://www.mnhn.fr/fr/collections/ensembles-collections/ressources-  
436 biologiques-cellules-vivantes-cryoconservees/microalgues-cyanobacteries](http://www.mnhn.fr/fr/collections/ensembles-collections/ressources-biologiques-cellules-vivantes-cryoconservees/microalgues-cyanobacteries)). Larger volume of  
437 all strains was simultaneously cultivated during one month in triplicates in 50 mL  
438 Erlenmeyer's vessels at 25°C using a Z8 medium with a 16 h: 8 h light/dark cycle (60  
439  $\mu\text{mol.m}^{-2}.\text{s}^{-1}$ ). All trains were investigated for their MC production by Adda-microcystin

440 AD4G2 ELISA kit (Abraxis). Cyanobacterial cells were centrifuged (at 4,000 g for 10 min),  
441 then freeze-dried and weighted, and stored at -80°C prior to DNA and metabolite analyses.

442

#### 443 6.2. DNA-extraction, PCR, sequencing and Phylogenetic analyses

444 DNA was extracted with Qiagen Kit (Cat N°69506) according to manufacturer's instructions.  
445 Presence and condition of the extracted DNA was confirmed by observing the 260/280-nm  
446 ratio and the absorbance spectra between 200 and 800 nm using a nanodrop  
447 spectrophotometer (Safas, Monaco). PCR reaction was performed with *mcyA* specific primers  
448 developed for *Microcystis* (*mcyA\_S* AAAAACCCGCGCCCTTTTAC and *mcyA\_AS*  
449 AGGCAGTTGGAGAATCACGG) in order to investigate the presence of this gene in the  
450 different strains. In parallel, the region containing a fragment 16S rRNA end of the 16S-23S  
451 ITS was amplified using primer couples previously described in Gugger and Hoffman (2004)  
452 and Itean *et al.* (2000), respectively. The amplification was done in a reaction mixture  
453 containing 0.1 µL (100 µM) of each primer, 12.5 µL MyTaq Red Mix polymerase (Bioline®)  
454 and 2 µL (~200 ng) DNA sample. Final volume of the reaction mixture was 25 µL. The PCR  
455 product was sequenced (Genoscreen, France) using the same primers. The partial 16S-ITS  
456 sequences (above 1980-bp long) of all strains were deposited to GenBank (accession numbers  
457 xxxxx-xxxx).

458 The *Microcystis* 16S-23S ITS gene sequences were compared to a selection of similar (>93%  
459 identity) sequences retrieved from NCBI based on a standard nucleotide BLAST search (basic  
460 local alignment search tool). The sequences were aligned with CodonCode Aligner and non-  
461 homologous regions of the sequence alignment were manually deleted in BioEdit (Version  
462 7.2.5). The phylogeny of the edited, aligned 16S-23S ITS sequences was performed in the  
463 program MEGA (Version 6). The trees based on maximum likelihood were constructed with  
464 1000 bootstrap replicates, with the branch lengths iterated and global rearrangements done.

465

#### 466 6.3. Metabolome biomass extraction and analysis by mass spectrometry

467 The 20 mL of biomasses of the 24 *Microcystis* strain cultures were centrifuged (4,000 rpm, 10  
468 min), the culture media discarded, and then freeze-dried. The lyophilized cells were weighted  
469 then sonicated 2 min in acetonitrile/methanol/water (40/40/20) acidified at 0.1% of formic  
470 acid with a constant ratio of 100 µL of solvent for 1 mg of dried biomass, centrifuged at 4°C  
471 (12,000 g; 5 min). Two µL of the supernatant were then analyzed on an UHPLC (Ultimate  
472 3000, ThermoFisher Scientific) coupled with a mass spectrometer (ESI-Qq-TOF Maxis II  
473 ETD, Bruker).

474 Ultra high performance liquid chromatography (UHPLC) was performed on 2 µL of each of  
475 the metabolite extracts using a Polar Advances II 2.5 pore C<sub>18</sub> column (Thermo®) at a 300  
476 µL.min<sup>-1</sup> flow rate with a linear gradient of acetonitrile in 0.1% formic acid (5 to 90% in 21  
477 min). The metabolite contents were analyzed in triplicate for each strain using an electrospray  
478 ionization hybrid quadrupole time-of-flight (ESI-QqTOF) high resolution mass spectrometer  
479 (Maxis II ETD, Bruker) on positive simple MS or on positive autoMSMS mode with  
480 information dependent acquisition (IDA), on the 50-1500 *m/z* rang at 2 Hz or between 2-16  
481 Hz speed, for MS and MS/MS respectively, according to relative intensity of parent ions, in  
482 consecutive cycle times of 2.5 s, with an active exclusion of previously analysed parents. The  
483 data were analyzed with the DataAnalysis 4.4 and MetaboScape 3.0 software for internal  
484 recalibration (<0.5 ppm), molecular feature search and MGF export. Peak lists were generated  
485 from MS/MS spectra between 1 and 15 min, with a filtering noise threshold at 0.1% maximal  
486 intensity and combining various charge states and related isotopic forms. Metabolite  
487 annotation was attempted according to the precise mass of the molecules and their respective  
488 MS/MS fragmentation patterns with regards to an in-house database of above 700

489 cyanobacteria metabolites and confirmed with few commercially available standard  
490 molecules analysed similarly in our platform.

491

#### 492 *6.4. Data and statistical analysis*

493 Heatmap representation of the global metabolome of the 24 *Microcystis* spp. monoclonal  
494 strains was performed with Gene-E tool (<https://software.broadinstitute.org/GENE-E/>) using  
495 the relative quantification (pic area) of 2051 molecular features analysed on HR ESI-Qq-TOF  
496 using MetaboScape 3.0 (Bruker) with a >5000 counts and 400-2000 Da threshold,  
497 considering peak presents in at least 3 different trains and in at least 6 consecutive MS scans.  
498 Then, the hierarchical clustering was performed according to Bray-Curtis distance method.  
499 NMDS and PERMANOVA analyses were performed using MicrobiomeAnalyst platform  
500 (<http://www.microbiomeanalyst.ca/>) in order to investigate the influence of the species, the  
501 sampling localities and of the production of MCs, described as the variables, on the global  
502 metabolite distribution of the global metabolome observed on ESI-Qq-TOF for the 24 strains.  
503 Using the whole MSMS data (converted in mgf format) obtained for the 24 strains taken  
504 together, a molecular network was created using the online workflow at Global Natural  
505 Products Social molecular networking (GNPS) (<http://gnps.ucsd.edu>) (Wang *et al.*, 2016).  
506 The data were then clustered with MS-Cluster with a parent mass tolerance of 1.0 Da and an  
507 MS/MS fragment ion tolerance of 0.5 Da to create consensus spectra. Consensus spectra that  
508 contained less than one spectrum were discarded. A network was then created where edges  
509 were filtered to have a cosine score above 0.6 and more than five matched peaks. Further  
510 edges between two nodes were kept in the network only if each of the nodes appeared in each  
511 other's respective top 10 most similar nodes. The spectra in the network were then searched  
512 against the GNPS spectral libraries. All matches kept between network spectra and library  
513 spectra were required to have a score above 0.6 and at least five matched peaks. The clustered  
514 spectra of the network were annotated by comparing monoisotopic mass to our in-house  
515 cyanobacteria metabolite databases according to MS and MS/MS fragmentation pattern  
516 matches. Molecular networks were visualized using Cytoscape 3.2.1.

517

### 518 **6. Acknowledgements**

519 This work was supported by grants from the CNRS Défi ENVIROMICS “Toxycyfish” project  
520 and from the ATM “Les micro-organismes, acteurs clef des écosystèmes” of the MNHN to  
521 Dr. Benjamin Marie. We would like to thank the French minister for the research for their  
522 financial supports Séverine Le Manach. The MS spectra were acquired at the Plateau  
523 technique de Spectrométrie de Masse Bio-organique, UMR 7245 Molécules de  
524 Communication et Adaptation des Micro-organismes, Muséum National d’Histoire Naturelle,  
525 Paris, France.

526

### 527 **Author contributions**

528 SLM, ME, AC, CB and BM conceived and designed the experiments; CD isolated all new  
529 strains of the PMC; CD, SLM, AM, CDJ performed the analysis; SLM, CD, AM, SZ and BM  
530 treated the data. All authors wrote and reviewed the manuscript.

531

### 532 **Conflict of interest**

533 The authors declare no conflict of interest.

534

### 535 **7. References**

536 Agha, R., Quesada, A. (2014) Oligopeptides as biomarkers of cyanobacterial subpopulations.  
537 Toward an understanding of their biological role. *Toxins* 6, 1929-50.  
538 Boudreau, P., Monroe, E., Mehrotra, S., Desfor, S., Korabeynikov, A., Sherman, D., Murray,

- 539 T., Gerwick, L., Dorrestein, P., Gerwick, W. (2015) Marine cyanobacterium *Moorea*  
540 *producens* JHB through orthogonal natural products workflows. *PLoS ONE*  
541 10:e0133297.
- 542 Briand, E., Escoffier, N., Straub, C., Sabart, M., Quiblier, C., Umbert, J-F. (2009)  
543 Spatiotemporal changes in the genetic diversity of a bloom-forming *Microcystis*  
544 *aeruginosa* (cyanobacteria) population. *ISME J.* 3, 419-429.
- 545 Briand, E., Bomans, M., Quiblier, C., Saleçon, M-J., Humbert, J-F. (2012) Evidence of the  
546 cost of the production of Microcystins by *Microcystis aeruginosa* under different light  
547 and nitrate environmental conditions. *PLoS ONE* 7:e29981.
- 548 Briand, E., Bormans, M., Gugger, M., Dorrestein, P.C., Gerwick, W. (2016a) Changes in  
549 secondary metabolic profiles of *Microcystis aeruginosa* strains in response to  
550 intraspecific interactions. *Environmental Microbiology* 18:384-400.
- 551 Briand, E., Humbert, J-F., Tambosco, K., Bormans, M., Gerwick, W; (2016b) Role of bacteria  
552 in the production and degradation of *Microcystis* cyanopeptides. *Microbiology Open*  
553 3:343.
- 554 Carey, C.C., Ibelings, B.W., Hoffmann, E.P., Hamilton, D.P., Brookes, J.D. (2012) Eco-  
555 physiological adaptations that favour freshwater cyanobacteria in a changing climate.  
556 *Water Res.* 46, 1394-1407. doi:10.1016/j.watres.2011.12.016
- 557 Carmichael, W. (2008) Cyanobacterial Harmful Algal Blooms: State of the Science and  
558 Research Needs. *Adv. Exp. Med. Biol.* 619, 831-53. doi:10.1007/978-0-387-75865-7
- 559 Catherine, A., Bernard, C., Spooof, L., Bruno, M. (2017). Microcystins and Nodularins. In  
560 Handbook of Cyanobacterial Monitoring and Cyanotoxin Analysis (eds J. Meriluoto, L.  
561 Spooof and G. A. Codd). doi:10.1002/9781119068761.ch11
- 562 Codd, G.A., Morrison, L.F., Metcalf, J.S. (2005) Cyanobacterial toxins: risk management for  
563 health protection. *Toxicol. Appl. Pharmacol.* 203, 264-72.  
564 doi:10.1016/j.taap.2004.02.01
- 565 Dittmann, E., Gugger, M., Sivonen, K., Fewer, D.P. (2015) Natural Product Biosynthetic  
566 Diversity and Comparative Genomics of the Cyanobacteria. *Trends Microbiol.* 23,  
567 642-652. doi:10.1016/j.tim.2015.07.008
- 568 Gan, N., Xiao, Y., Zhu, L., Wu, Z., Liu, J., Hu, C., Song, L., 2012. The role of microcystins in  
569 maintaining colonies of bloom-forming *Microcystis* spp. *Environ. Microbiol.* 14,  
570 730-742. doi:10.1111/j.1462-2920.2011.02624.x
- 571 Gugger, M., Hoffmann, L. (2004) Polyphyly of true branching cyanobacteria  
572 (Stigonematales). *Int J Syst Evol Microbiol* 54, 349-57.
- 573 Gugger, M., Lyra, C., Suominen, I., Tsitko, I., Humbert, J-F., Salkinoja-Salonen, M.,  
574 Sivonen, K. (2002) Cellular fatty acids as chemotaxonomic makers of the genera  
575 *Anabaena*, *Aphanizomenon*, *Microcystis*, *Nostoc* and *Planktothrix*. *Int. J. System. Evol.*  
576 *Microbiol.* 52, 1007-1015.
- 577 Guljamow, A., Kreische, M., Ishida, K., Liaimer, A., Altermark, B., Bähr, L., Hertweck, C.,  
578 Ehwald, R., Dittmann, E. (2017) High-density cultivation of terrestrial *Nostoc* strains  
579 leads to reprogramming of secondary metabolome. *Appl Environ Microbiol.*  
580 83 :e01510-17.
- 581 Haande, S., Ballot, A., Rohrlack, T., Fastner, J., Wiedner, C., Edvardsen, B. (2007) Diversity  
582 of *Microcystis aeruginosa* isolates (Chroococcales, Cyanobacteria) from East-African  
583 water bodies. *Arch. Microbiol.* 188, 15-25. doi:10.1007/s00203-007-0219-8
- 584 Harke, M.J., Steffen, M.M., Gobler, C.J., Otten, T.G., Wilhelm, S.W., Wood, S.A., Paerl,  
585 H.W. (2016) A review of the global ecology, genomics, and biogeography of the toxic  
586 cyanobacterium, *Microcystis* spp. *Harmful Algae* 54, 4-20.  
587 doi:10.1016/j.hal.2015.12.007



- 588 Harke, M.J., Jankowiak, J.G., Morrell, B.K., Gobler, C.J. (2017) Transcriptomic Responses in  
589 the Bloom-Forming Cyanobacterium *Microcystis* Induced during Exposure to  
590 Zooplankton. *Appl Environ Microbiol.* 15;83(5).
- 591 Holland, A., Kinnear, S. (2013) Interpreting the possible ecological role(s) of cyanotoxins:  
592 compounds for competitive advantage and/or physiological aide? *Mar. Drugs* 11,  
593 2239-58. doi:10.3390/md11072239
- 594 Humbert, J-F., Duris-Latour, D., Le Berre, B., Giraudet, H., Salençon, M.J. (2005) Genetic  
595 diversity in *Microcystis* populations of a French storage reservoir assessed by  
596 sequencing of 16S-23S rRNA intergenic spacer. *Microbiol Ecology* 49, 308-314.
- 597 Humbert, J-F., Barbe, V., Latifi, A., Gugger, M., Camteau, A., Coursin, T., Lajus, A.,  
598 Castelli, V., Oztas, S., Samson, G., Longin, C., Medigue, C., Tandeau de Marsac, N.  
599 (2013) A tribute to disorder in the genome of the bloom-forming freshwater  
600 cyanobacterium *Microcystis aeruginosa*. *PLoS ONE* 8: e70747.
- 601 Iteman, I., Rippka, R., Tandeau de Marsac, N., et al. (2000) Comparison of conserved  
602 structural and regulatory domains within divergent 16SrRNA–23S rRNA spacer  
603 sequences of cyanobacteria. *Microbiology* 146:1275–86.
- 604 Ivanisevic, J., Thomas, O., Lejeune, C., Chavalonné, P., Perez, T. (2011) Metabolic  
605 fingerprinting as an indicator of biodiversity: towards understanding inter-specific  
606 relationships among Homoscleromorpha sponges. *Metabolomics* 7: 289-304.
- 607 Komárek, J. (2016). A polyphasic approach for the taxonomy of cyanobacteria: principles and  
608 applications. *European Journal of Phycology*, 51(3), 346-353.
- 609 Liu, Y., Xu, Y., Wang, Z., Xiao, P., Yu, G., Wang, G., Li, R. (2016) Dominance and  
610 succession of *Microcystis* genotypes and morphotypes in Lake Taihu, a large and  
611 shallow freshwater lake in China. *Environ. Pollut.* 219, 399-408.  
612 doi:10.1016/j.envpol.2016.05.021
- 613 Ma, J., Qin, B., Paerl, H.W., Brookes, J.D., Hall, N.S., Shi, K., Zhou, Y., Guo, J., Li, Z., Xu,  
614 H., Wu, T., Long, S. (2016) The persistence of cyanobacterial (*Microcystis* spp.) blooms  
615 throughout winter in Lake Taihu, China. *Limnol. Oceanogr.* 61, 711-722.  
616 doi:10.1002/lno.10246
- 617 Martins, J., Saker, M.L., Moreira, C., Welker, M., Fastner, J., Vasconcelos, V.M. (2009)  
618 Peptide diversity in strains of the cyanobacterium *Microcystis aeruginosa* isolated from  
619 Portuguese water supplies. *Appl. Microbiol. Biotechnol.* 82, 951-961.
- 620 Martins, J., Vasconcelos, V. (2015) Cyanobactins from cyanobacteria: Current genetic and  
621 chemical state of knowledge. *Mar. Drugs* 13, 6910-6946. doi:10.3390/md13116910
- 622 Otsuka, S., Suda, S., Shibata, S., Oyaizu, H., Matsumoto, S., Watanabe, M.M (2001) A  
623 proposal for the unification of five species of the cyanobacterial genus *Microcystis*  
624 Kützing ex Lemmermann 1907 under the rules of the Bacteriological Code. *Int J Syst*  
625 *Evol Microbiol.* 51(Pt 3), 873-9.
- 626 Otsuka, S., Suda, S., Li, R., Matsumoto, S., Watanabe, M.M. (2000) Morphological  
627 variability of colonies of *Microcystis* morphospecies in culture. *J Gen Appl Microbiol.*  
628 46(1), 39-50.
- 629 Otsuka, S., Suda, S., Li, R., Watanabe, M. (1999) Phylogenetic relationships between toxic  
630 and non-toxic strains of the genus *Microcystis* based on 16S to 23S internal transcribed  
631 spacer sequence, *FEMS Microbiol. Lett.* 172 (1),15–21.
- 632 Paerl, HW. (2018) Mitigating Toxic Planktonic Cyanobacterial Blooms in Aquatic  
633 Ecosystems Facing Increasing Anthropogenic and Climatic Pressures. *Toxins* 8;10(2).
- 634 Paerl, H.W., Hall, N.S., Calandrino, E.S. (2011) Controlling harmful cyanobacterial blooms  
635 in a world experiencing anthropogenic and climatic-induced change. *Sci. Total Environ.*  
636 409, 1739-45. doi:10.1016/j.scitotenv.2011.02.001
- 637 Pearson, L., Mihali, T., Moffitt, M., Kellmann, R., Neilan, B. (2010) On the chemistry,

- 638 toxicology and genetics of the cyanobacterial toxins, microcystin, nodularin, saxitoxin  
639 and cylindrospermopsin. *Mar. Drugs* 8, 1650-80. doi:10.3390/md8051650
- 640 Šejnohová, L., Maršálek, B. (2012) *Microcystis*, in: Ecology of Cyanobacteria II: Their  
641 Diversity in Space and Time. Springer Netherlands, Dordrecht, p. 195-228.  
642 doi:10.1007/978-94-007-3855-3\_7
- 643 Shih, P.M., Wu, D., Latifi, A., Axen, S.D., Fewer, D.P., Talla, E., Calteau, A., Cai, F.,  
644 Tandeau de Marsac, N., Rippka, R., Herdman, M., Sivonen, K., Coursin, T., Laurent, T.,  
645 Goodwin, L., Nolan, M., Davenport, K.W., Han, C.S., Rubin, E.M., Eisen, J. a, Woyke,  
646 T., Gugger, M., Kerfeld, C. (2013) Improving the coverage of the cyanobacterial phylum  
647 using diversity-driven genome sequencing. *Proc. Natl. Acad. Sci. U. S. A.* 110, 1053-8.  
648 doi:10.1073/pnas.1217107110
- 649 Sivonen, K., Leikoski, N., Fewer, D.P., Jokela, J. (2010) Cyanobactins-ribosomal cyclic  
650 peptides produced by cyanobacteria. *Appl. Microbiol. Biotechnol.* 86, 1213-1225.  
651 doi:10.1007/s00253-010-2482-x
- 652 Sukenik, A., Quesada, A., Salmaso, N. (2015) Global expansion of toxic and non-toxic  
653 cyanobacteria: effect on ecosystem functioning. *Biodivers. Conserv.* 4:889-908.
- 654 Sun, L-W., Jiang, W-J., Sato, H., Kawachi, M., Lu, X-W. (2016) Rapid classification and  
655 identification of *Microcystis* strains using MALDI-TOF MS and polyphasic analysis.  
656 PLoS ONE 11: e0156275.
- 657 Tillett, D., Parker, D. L., & Neilan, B. A. (2001). Detection of toxigenicity by a probe for the  
658 microcystin synthetase A gene (*mcyA*) of the cyanobacterial genus *Microcystis*:  
659 comparison of toxicities with 16S rRNA and phycocyanin operon (phycocyanin  
660 intergenic spacer) phylogenies. *Applied and environmental microbiology*, 67(6), 2810-  
661 2818.
- 662 Tonk, L., Visser, P.M., Christiansen, G., Dittmann, E., Snelder, E.O.F.M., Wiedner, C., Mur,  
663 L.R., Huisman, J. (2005) The microcystin composition of the cyanobacter-ium  
664 *Planktothrix agardhii* changes towards a more toxic variant with increasing light  
665 intensity. *Appl. Environ. Microbiol.* 71, 5177–5181.
- 666 Tonk, L., Welker, M., Huisman, J., Visser, P.M. (2009) Production of cyanopeptolins,  
667 anabaenopeptins, and microcystins by the harmful cyanobacteria *Anabaena* 90 and  
668 *Microcystis* PCC 7806. *Harmful Algae* 8, 219-224. doi:10.1016/j.hal.2008.05.005
- 669 Via-Ordorika, L., Fastner, J., Kurmayer, R., Hisbergues, M., Dittmann, E., Komarek, J.,  
670 Erhard, M., Chorus, I. (2004) Distribution of microcystin-producing and non-  
671 microcystin-producing *Microcystis* sp. in European freshwater bodies: detection of  
672 microcystins and microcystin genes in individual colonies. *Syst Appl Microbiol.* 27(5),  
673 592-602.
- 674 Wang, H., Fewer, D.P., Holm, L., Rouhiainen, L., Sivonen, K. (2014) Atlas of nonribosomal  
675 peptide and polyketide biosynthetic pathways reveals common occurrence of  
676 nonmodular enzymes. *Proc Natl Acad Sci U S A.* 111(25), 9259-64.
- 677 Welker, M., Brunke, M., Preussel, K., Lippert, I., von Döhren, H. (2004) Diversity and  
678 distribution of *Microcystis* (cyanobacteria) oligopeptide chemotypes from natural  
679 communities studies by single-colony mass spectrometry. *Microbiology* 150, 1785-1796.  
680 doi:10.1099/mic.0.26947-0
- 681 Welker, M., Von Döhren, H. (2006) Cyanobacterial peptides - Nature's own combinatorial  
682 biosynthesis. *FEMS Microbiol. Rev.* 30, 530-563. doi:10.1111/j.1574-6976.2006.00022.x
- 683 Welker, M., Maršálek, B., Šejnohová, L., von Döhren, H. (2006) Detection and identification  
684 of oligopeptides in *Microcystis* (cyanobacteria) colonies: Toward an understanding of  
685 metabolic diversity. *Peptides* 27, 2090-2103. doi:10.1016/j.peptides.2006.03.014
- 686 Welker, M., Ejnohová, L., Némethová, D., von Döhren, H., Jarkovsky, J., Marsálek, B. (2007)  
687 Seasonal shifts in chemotype composition of *Microcystis* sp. communities in the pelagial

- 688 and the sediment of a shallow reservoir. *Limnol. Oceanogr.* 52, 609-619.  
689 doi:10.4319/lo.2007.52.2.0609
- 690 Welker, M., Dittmann, E., Von Döhren, H. (2012) Cyanobacteria as a source of natural  
691 products. *Methods Enzymol.* 517, 23-46. doi:10.1016/B978-0-12-404634-4.00002-4
- 692 Whitton, B.A. (2012) Ecology of Cyanobacteria II, Ecology of Cyanobacteria II: Their  
693 Diversity in Space and Time. Springer Netherlands, Dordrecht. doi:10.1007/978-94-007-  
694 3855-3
- 695 Yang, J.Y., Sanchez, L.M., Rath, C.M., Liu, X., Boudreau, P.D., Bruns, N., Glukhov, E.,  
696 Wodtke, A., De Felicio, R., Fenner, A., Wong, W.R., Linington, R.G., Zhang, L.,  
697 Deboni, H.M., Gerwick, W.H., Dorrestein, P.C. (2013) Molecular networking as a  
698 dereplication strategy. *J. Nat. Prod.* 76, 1686-1699. doi:10.1021/np400413s
- 699 Zak, A., Kosakowska, A. (2016) Cyanobacterial and microalgal bioactive compounds-the role  
700 of secondary metabolites in allelopathic interactions. *Oceanol. Hydrobiol. Stud.* 45,  
701 131-143. doi:10.1515/ohs-2016-0013
- 702 Zurawell, R.W., Chen, H., Burke, J.M., Prepas, E.E. (2005) Hepatotoxic cyanobacteria: a  
703 review of the biological importance of microcystins in freshwater environments. *J.*  
704 *Toxicol. Environ. Health. B. Crit. Rev.* 8, 1-37. doi:10.1080/10937400590889412
- 705 Zwart, G., Hiorns, W.D., Methe, B.A., van Agterveld, M.P., Huismans, R., Nold, S.C., Zehr,  
706 J.P., Laanbroek, H.J. (1998) Nearly identical 16S rRNA sequences recovered from lakes  
707 in North America and Europe indicate the existence of clades of globally distributed  
708 freshwater bacteria. *Syst Appl Microbiol.* 21(4):546-556.  
709

## 710 Legends of figures

711

712 **Table 1: List of *Microcystis* spp. strains used in this study, their area of origin, the**  
713 **ELISA MC screening, the *mcyA* gene presence and their respective 16S-ITS sequence**  
714 **accession numbers.** Strains isolated from the same sample collected the same day from  
715 different French area are indicated with: <sup>a</sup>= Villerest (2008); <sup>b</sup>= Varennes-sur-Seine (2008); <sup>c</sup>  
716 = Eure et Loire (2010); <sup>d</sup>= Valence (2011); <sup>e</sup>= Champs –sur-Marne (2012).

717

718 **Figure 1: *Microcystis* spp.** General view of a representative intense *Microcystis* sp. bloom in  
719 a recreational pound (Champs-sur-Marne, © B. Marie) (A). Macrograph of *Microcystis*  
720 colonies at surface water (© B. Marie) (B). Example of 15-mL vessels containing the  
721 monoclonal strains of *Microcystis* spp. maintained in the Paris' Museum Collection (PMC) of  
722 cyanobacteria (MNHN, Paris, © C. Duval) (C). Example of micrograph of the isolated  
723 monoclonal culture of the *Microcystis aeruginosa*, where scale bare represents 10 µm (© C.  
724 Duval) (D). Representative picture of *Microcystis aeruginosa* cell from PMC 156.02 strain  
725 (here in division) under transmission electron microscope, where scale bare represents 0.5 µm  
726 (© C. Djediat) (E). General structures of various cyanobacterial metabolites belonging to the  
727 microcystin, anabaenopeptin, microginin microviridin, aeruginosin and oscillatorin families  
728 (F).

729

730 **Figure 2: Maximum likelihood (ML) tree based on partial 16S-23S ITS sequences.** The  
731 sequences obtained in this study are indicated in bold. The strains, which exhibit *mcyA* gene,  
732 are indicated in red. Other sequences were retrieved from GenBank, accession numbers in  
733 brackets. Bootstrap values >60% are shown at the nodes. The scale bar indicates number of  
734 nucleotide substitutions per site. The *Microcystis* sp. AICB832 was used as an out-group.

735

736 **Figure 3:** Heatmap representation of the metabolome of the 24 *Microcystis* spp. monoclonal  
737 strains analysed using HR ESI-TOF, representing 2051 different analytes (present in at least  
738 three strains, with minimal peak intensity > 5000 counts) identified by MetaboScape  
739 software. The hierarchical clustering between strains was performed according to Bray-Curtis  
740 distance method. Blue and green squares indicate *M. aeruginosa* and *M. wessenbergii/viridis*,  
741 respectively. Sampling localities are: C=Champs-sur-Marne; B=Burkina Faso; E=Eure et  
742 Loire; Ne=Netherlands; Sc=Scotland; Se=Senegal; So=Souppes-sur-Loin; Var=Varennes-sur-  
743 Seine; Val=Valence; Vi=Villerest.

744

745 **Figure 4:** Molecular network generated from MS/MS spectra from the 24 *Microcystis* strains  
746 using GNPS tool (all data and results are freely available on the GNPS server at the address  
747 <http://gnps.ucsd.edu/ProteoSAFe/status.jsp?task=c017414365e84334b38ae75728715552>).

748 The nodes of the analytes detected in *M. aruginosa* or *M. wessenbergii/viridis* strains only are  
749 indicated in green and blue, respectively, when analytes detected in both species are indicated  
750 in orange. Uncharacterized analytes are indicated by circles constituting potential new  
751 analogues. Analytes whom individual masses match with known secondary metabolites from  
752 cyanobacteria (listed in supplementary table 1) are indicated as specific shapes. Standard  
753 molecules analyses similarly are indicated by a heavy black perimeter. Only cluster  
754 regrouping at least 2 analytes are represented.

755

756 **Figure 5:** Microcystins clusters highlighted by the GNPS analysis based on the MS/MS CID  
757 fragmentation spectra obtained from the 24 *Microcystis* strains. Analytes detected in *M.*  
758 *aeruginosa* or *M. wessenbergii/viridis* strains only are indicated in green and blue,  
759 respectively, when analytes detected in both genera are in orange. Analytes whom individual



760 masses match with known microcystins are indicated as hexagons. Standard molecules  
761 analyses similarly are indicated by a heavy black perimeter. Example of MS/MS spectra and  
762 chemical structures are shown for (Asp<sub>3</sub>)-microcystin-LR, microcystin-YR, -LR, -LF, -LA  
763 and -HtyR. Notice that (M+H)<sup>+</sup> and (M+2H)<sup>2+</sup> ions may be grouped in distinct clusters.  
764

765 **Figure 6:** Aeruginosin cluster highlighted by the GNPS analysis based on the MS/MS CID  
766 fragmentation spectra obtained from the 24 *Microcystis* strains. Analytes detected in *M.*  
767 *aeruginosa* or *M. wessenbergii/viridis* strains only are indicated in green and blue,  
768 respectively, when analytes detected in both genera are in orange. Analytes whom individual  
769 masses match with known aeruginosins are indicated as squares with right corners. Standard  
770 molecules analyses similarly are indicated by a heavy black perimeter. Example of MS/MS  
771 spectra and chemical structures are shown for aeruginosin 98A and 98B.  
772

773 **Figure 7:** Anabaenopeptin clusters highlighted by the GNPS analysis based on the MS/MS  
774 CID fragmentation spectra obtained from the 24 *Microcystis* strains. Analytes detected in *M.*  
775 *aeruginosa* strains are indicated in green. Analytes whom individual masses match with  
776 known anabaenopeptin are indicated as squares with round corners. Standard molecules are  
777 indicated by a heavy black perimeter. Uncharacterized analytes are indicated by circles  
778 constituting potential new analogues. Example of MS/MS spectra and chemical structures are  
779 shown for anabaenopeptin A, B, F and Oscillamide Y. Notice that (M+H)<sup>+</sup> and (M+2H)<sup>2+</sup>  
780 ions may be represented by different nodes grouped in distinct clusters.  
781

782 **Figure 8:** Cyanopeptolin clusters highlighted by the GNPS analysis based on the MS/MS CID  
783 fragmentation spectra obtained from the 24 *Microcystis* strains. Analytes detected in *M.*  
784 *aeruginosa* strains are indicated in green. Analytes whom individual masses match with  
785 known cyanopeptolin are indicated as parallelepiped. Standard molecules are indicated by a  
786 heavy black perimeter. Uncharacterized analytes analyses similarly are indicated by circles  
787 constituting potential new analogues. Example of MS/MS spectra and chemical structures are  
788 shown for cyanopeptolin A and B.  
789

790 **Figure 9:** Microginin clusters highlighted by the GNPS analysis based on the MS/MS CID  
791 fragmentation spectra obtained from the 24 *Microcystis* strains. Analytes detected in *M.*  
792 *aeruginosa* strains only are indicated in green and blue, when analytes detected in both genera  
793 are in orange. Analytes whom individual masses match with known microginin are indicated  
794 as 45°-tilted squares. Standard molecules analyses similarly are indicated by a heavy black  
795 perimeter. Uncharacterized analytes are indicated by circles constituting potential new  
796 analogues. Example of MS/MS spectra and chemical structures are shown for microginin  
797 FR1, FR2, 711 and 757.  
798

799 **Figure 10:** Aerucyclamide clusters highlighted by the GNPS analysis based on the MS/MS  
800 CID fragmentation spectra obtained from the 24 *Microcystis* strains. Analytes detected in *M.*  
801 *aeruginosa* or *M. wessenbergii/viridis* strains only are indicated in green and blue,  
802 respectively, when analytes detected in both genera are in orange. Analytes whom individual  
803 masses match with known aerucyclamides are indicated as octagons. Uncharacterized  
804 analytes are indicated by circles constituting potential new analogues. Standard molecules  
805 analyses similarly are indicated by a heavy black perimeter. Example of MS/MS spectra and  
806 chemical structures are shown for aerucyclamide A, B and D.  
807

808 **Supplementary figures**

809

810 **Supplementary Figure 1:** Representation of the analytes from the 24 *Microcystis* strains  
811 analysed by MS simple and MS/MS mode, exhibiting the good representativeness of analytes  
812 selected for MS/MS analyses. All analysed ions are represented according to their respective  
813 RT and *m/z* ratio. For MS/MS data, the size of the circle being representative of their  
814 maximum peak intensity.

815

816 **Supplementary Figure 2:** NMDS analysis of global metabolite patterns of the 24 *Microcystis*  
817 spp. monoclonal strains analysed using HR ESI-TOF, with PERMANOVA analyses  
818 performed on MicrobiomeAnalyst platform with Bray-Curtis index according to the MC  
819 production (left) and to the genera (right). “MC production”, “species”, and “locality” factor  
820 present significant impact on the global metabolome.

821

822 **Supplementary Figure 3:** Unknown cluster “1” highlighted by the GNPS analysis based on  
823 the MS/MS CID fragmentation spectra obtained from the 24 *Microcystis* strains. This cluster  
824 of uncharacterized molecules that present high fragmentation similarity main correspond to a  
825 new kind of metabolites that still need to be characterized. Analytes detected in *M.*  
826 *aeruginosa* or *M. wessenbergii/viridis* strains only are indicated in green and blue,  
827 respectively, when analytes detected in both genera are in orange.

828

829 **Supplementary Figure 4:** Unknown cluster “2” highlighted by the GNPS analysis based on  
830 the MS/MS CID fragmentation spectra obtained from the 24 *Microcystis* strains. This cluster  
831 of uncharacterized molecules that present high fragmentation similarity main correspond to a  
832 new kind of metabolites that still need to be characterized. Analytes detected in *M. aruginosa*  
833 and *M. wessenbergii/viridis* strains are indicated in orange.

834

835 **Supplementary Figure 5:** Unknown cluster “3-5” highlighted by the GNPS analysis based  
836 on the MS/MS CID fragmentation spectra obtained from the 24 *Microcystis* strains. This  
837 cluster of uncharacterized molecules that present high fragmentation similarity main  
838 correspond to a new kind of metabolites that still need to be characterized. Analytes detected  
839 in *M. wessenbergii/viridis* strains only are indicated in blue.

840

841 **Table 1.**  
 842  
 843

| Strain name             | Species                       | Country      | Locality/area       | MC ELISA detection | <i>mcyA</i> PCR detection | 16S-ITS Accession number |
|-------------------------|-------------------------------|--------------|---------------------|--------------------|---------------------------|--------------------------|
| PCC 7806                | <i>M. aeruginosa</i>          | Netherland   | Braakman            | +                  | +                         | xxxxxx                   |
| PCC 7820                | <i>M. aeruginosa</i>          | Scotland     | Balgavies           | +                  | +                         | xxxxxx                   |
| PMC 95.02 <sup>a</sup>  | <i>M. aeruginosa</i>          | France       | Villerest           | -                  | -                         | xxxxxx                   |
| PMC 98.15 <sup>a</sup>  | <i>M. aeruginosa</i>          | France       | Villerest           | -                  | -                         | xxxxxx                   |
| PMC 155.02              | <i>M. aeruginosa</i>          | Sénégal      | Djoudj              | -                  | -                         | xxxxxx                   |
| PMC 156.02              | <i>M. aeruginosa</i>          | Sénégal      | Djoudj              | -                  | -                         | xxxxxx                   |
| PMC 241.05              | <i>M. aeruginosa</i>          | Burkina Faso | Ouahigouya          | +                  | +                         | xxxxxx                   |
| PMC 265.06              | <i>M. aeruginosa</i>          | Burkina Faso | Sian                | -                  | -                         | xxxxxx                   |
| PMC 566.08 <sup>b</sup> | <i>M. wesenbergii/viridis</i> | France       | Varennnes sur Seine | -                  | -                         | xxxxxx                   |
| PMC 567.08 <sup>b</sup> | <i>M. wesenbergii/viridis</i> | France       | Varennnes sur Seine | -                  | -                         | xxxxxx                   |
| PMC 570.08              | <i>M. aeruginosa</i>          | France       | Souppes sur Loing   | -                  | -                         | xxxxxx                   |
| PMC 671.10 <sup>c</sup> | <i>M. wesenbergii/viridis</i> | France       | Eure et Loire       | -                  | -                         | xxxxxx                   |
| PMC 672.10 <sup>c</sup> | <i>M. wesenbergii/viridis</i> | France       | Eure et Loire       | -                  | -                         | xxxxxx                   |
| PMC 673.10 <sup>c</sup> | <i>M. wesenbergii/viridis</i> | France       | Eure et Loire       | -                  | -                         | xxxxxx                   |
| PMC 674.10 <sup>c</sup> | <i>M. wesenbergii/viridis</i> | France       | Eure et Loire       | -                  | -                         | xxxxxx                   |
| PMC 679.10 <sup>c</sup> | <i>M. aeruginosa</i>          | France       | Eure et Loire       | +                  | +                         | xxxxxx                   |
| PMC 727.11 <sup>d</sup> | <i>M. aeruginosa</i>          | France       | Valence             | -                  | -                         | xxxxxx                   |
| PMC 728.11 <sup>d</sup> | <i>M. aeruginosa</i>          | France       | Valence             | +                  | +                         | xxxxxx                   |
| PMC 729.11 <sup>d</sup> | <i>M. aeruginosa</i>          | France       | Valence             | +                  | +                         | xxxxxx                   |
| PMC 730.11 <sup>d</sup> | <i>M. aeruginosa</i>          | France       | Valence             | -                  | -                         | xxxxxx                   |
| PMC 807.12 <sup>e</sup> | <i>M. wesenbergii/viridis</i> | France       | Champs sur Marne    | +                  | +                         | xxxxxx                   |
| PMC 810.12 <sup>e</sup> | <i>M. aeruginosa</i>          | France       | Champs sur Marne    | -                  | -                         | xxxxxx                   |
| PMC 816.12 <sup>e</sup> | <i>M. aeruginosa</i>          | France       | Champs sur Marne    | +                  | +                         | xxxxxx                   |
| PMC 826.12 <sup>e</sup> | <i>M. aeruginosa</i>          | France       | Champs sur Marne    | -                  | -                         | xxxxxx                   |

844

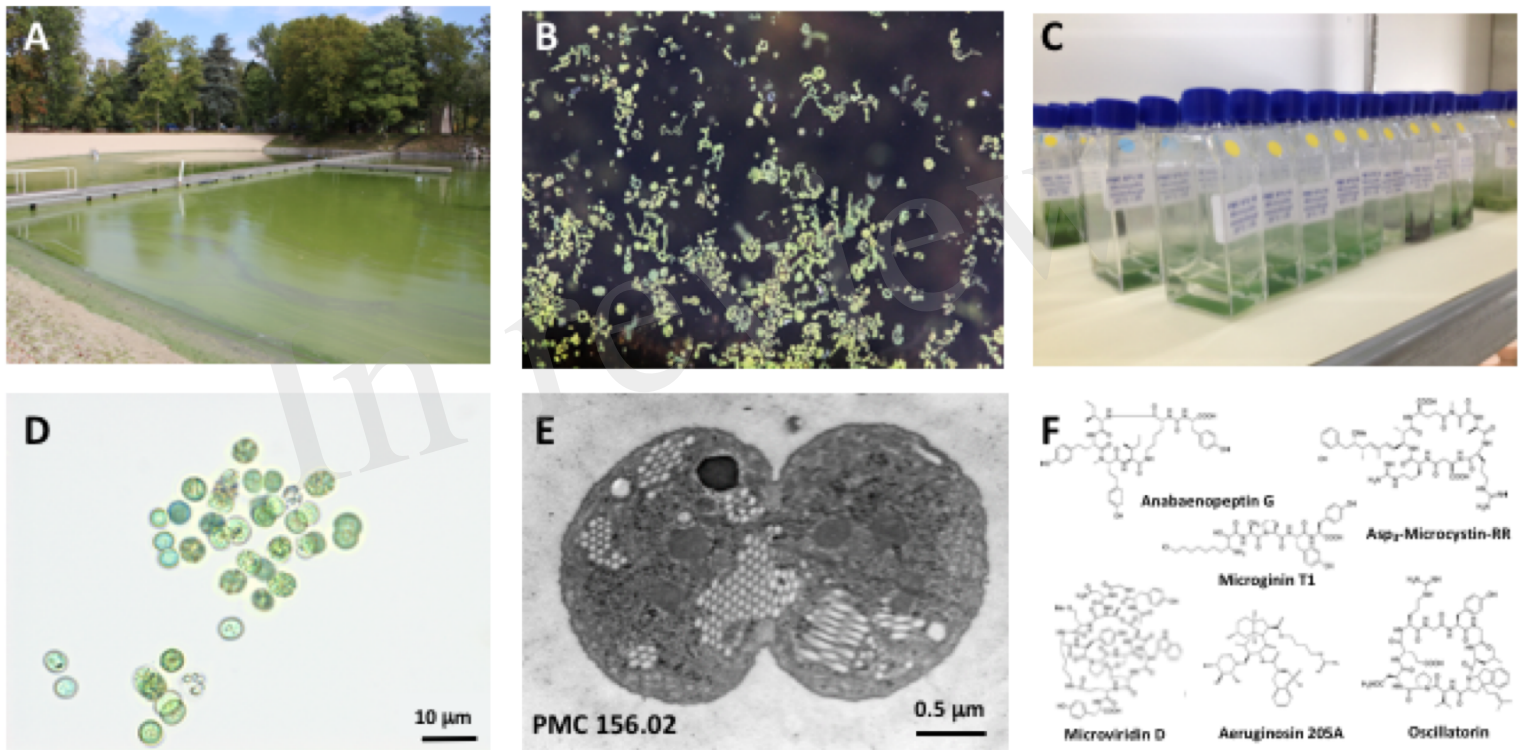



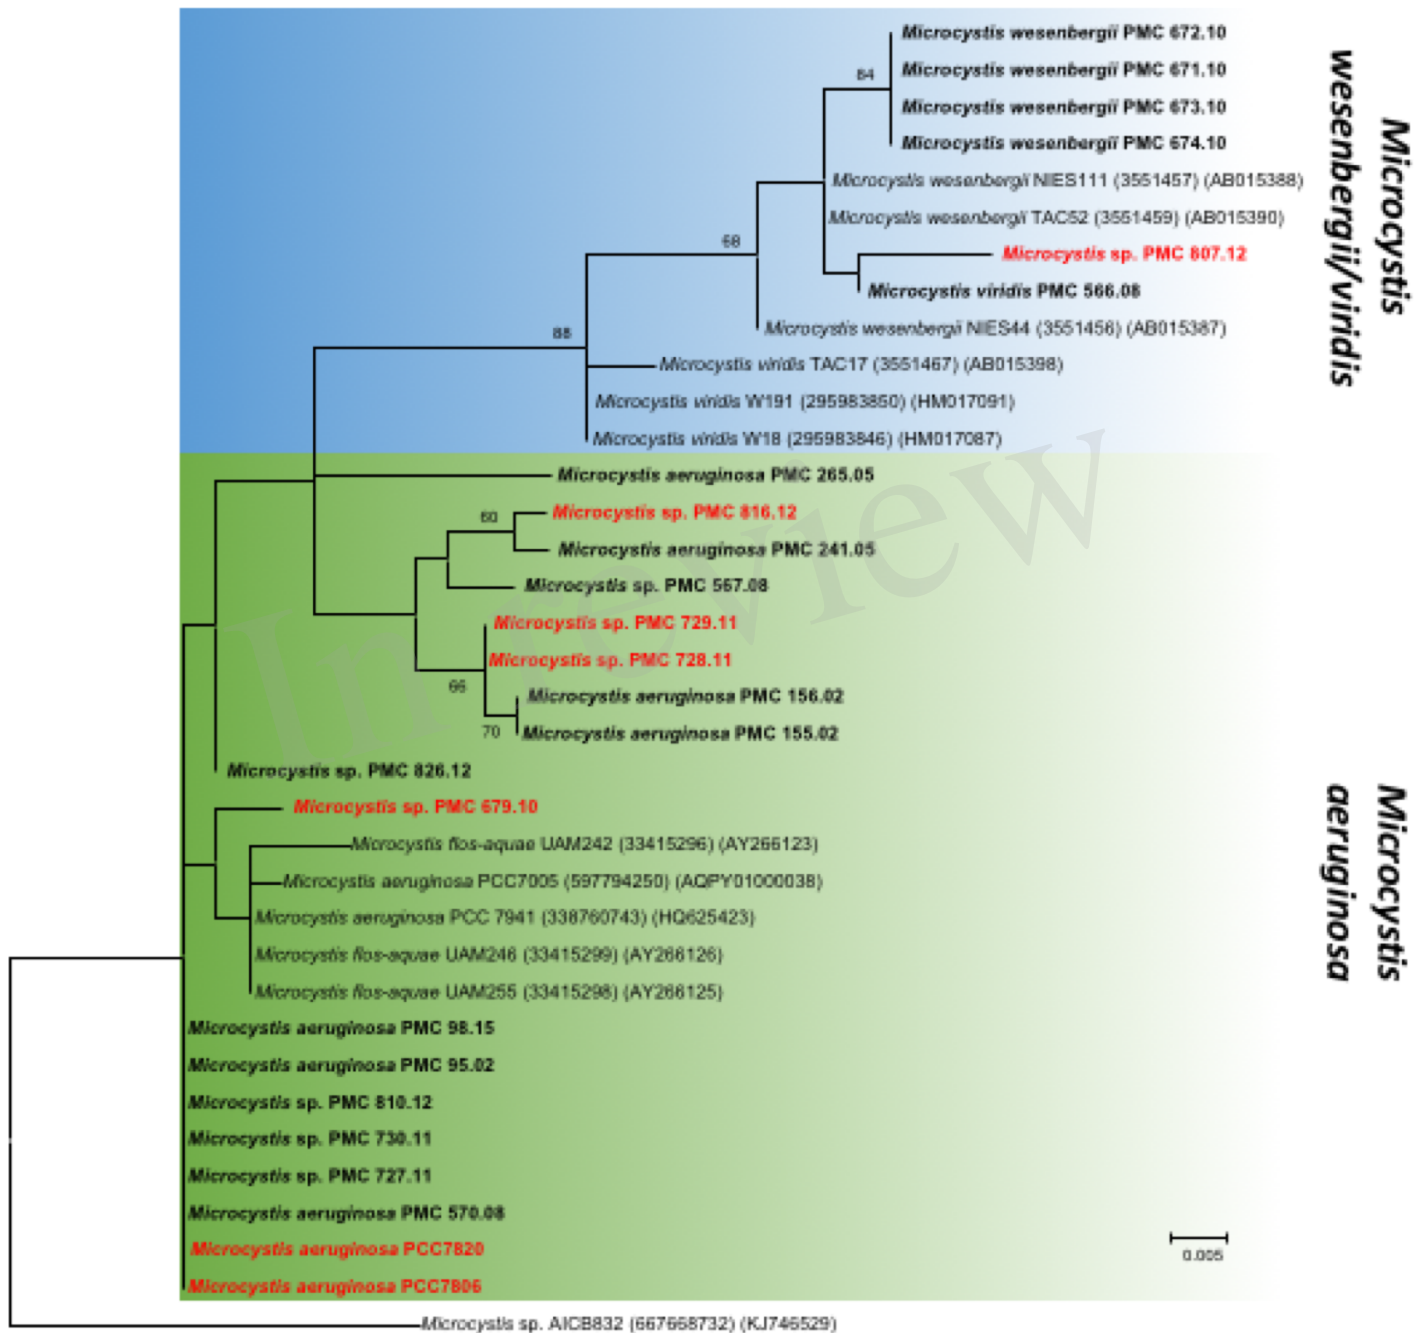

Figure 3

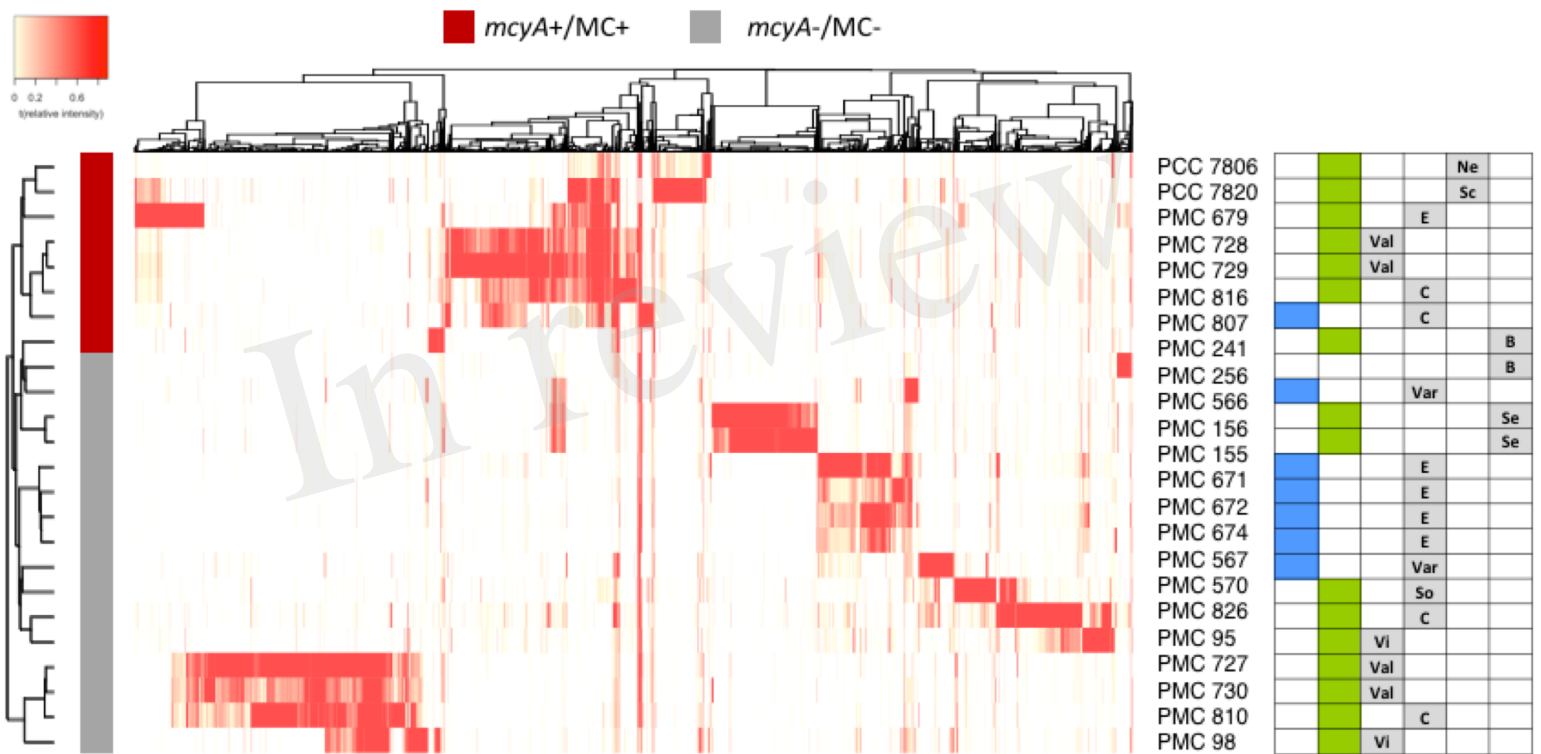

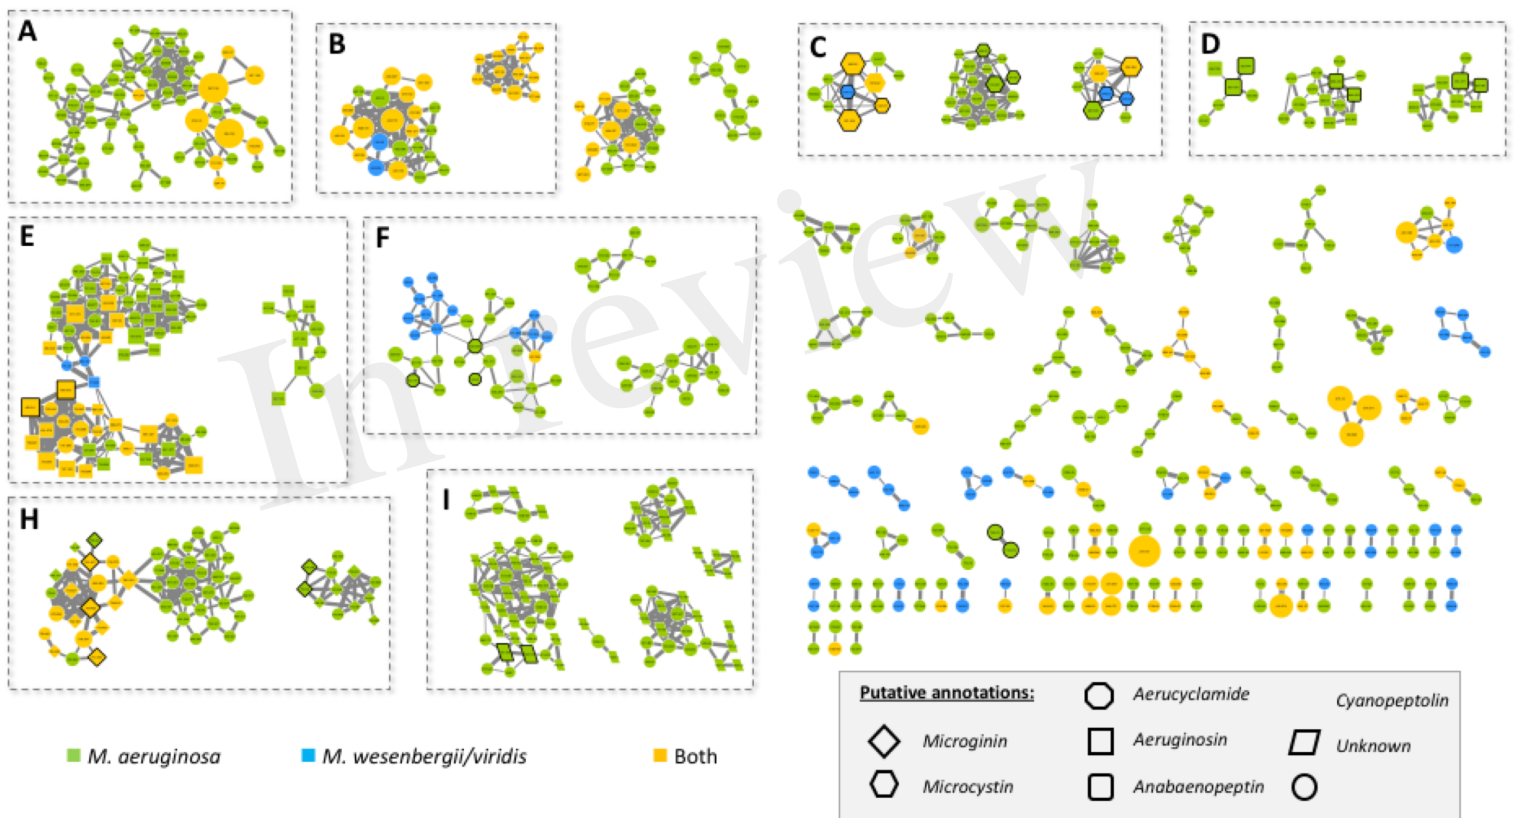





Figure 4

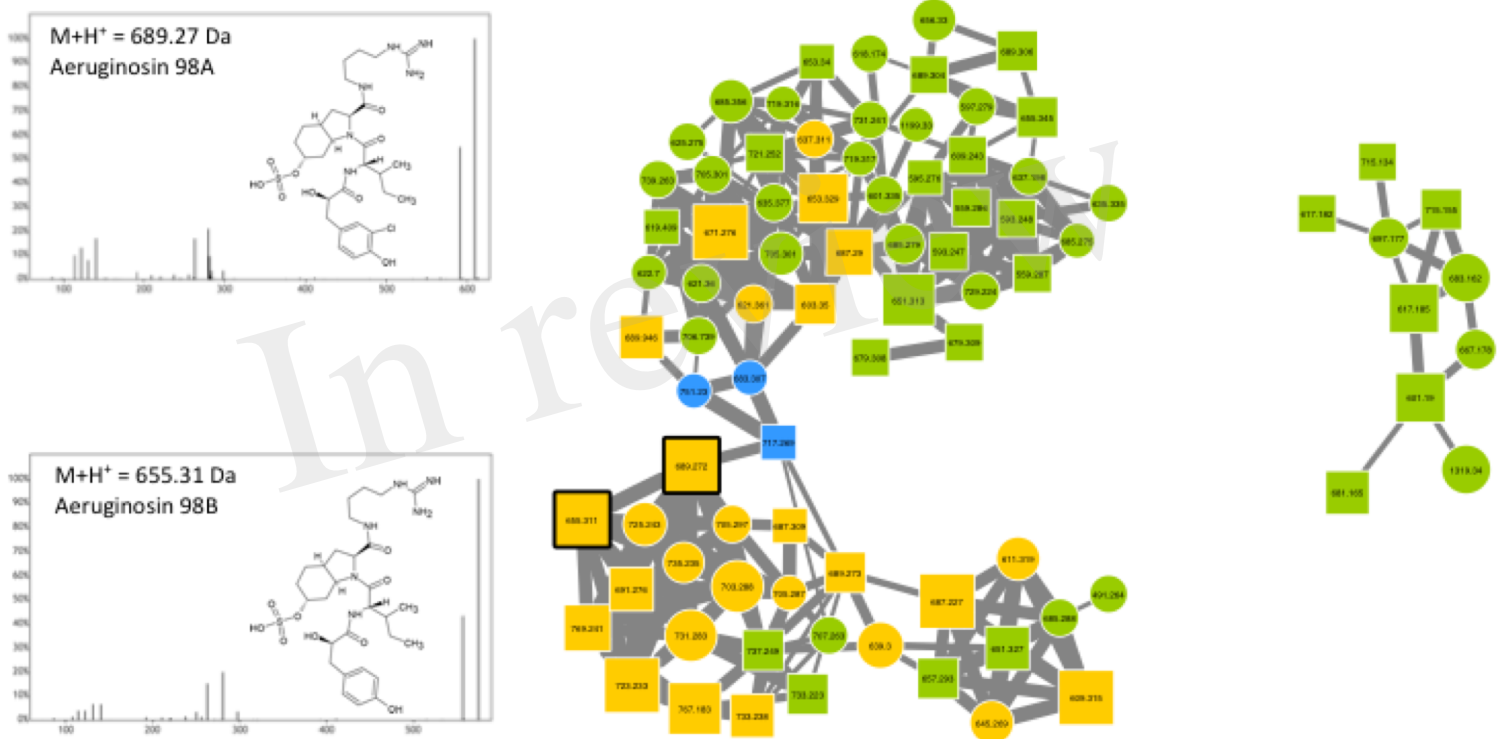

Figure 11

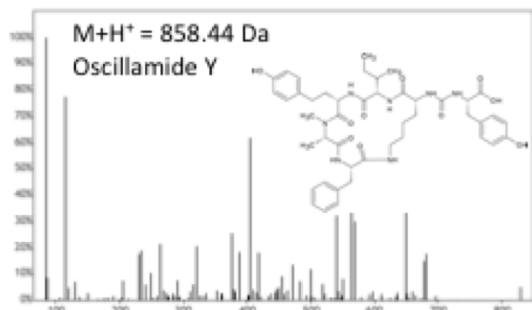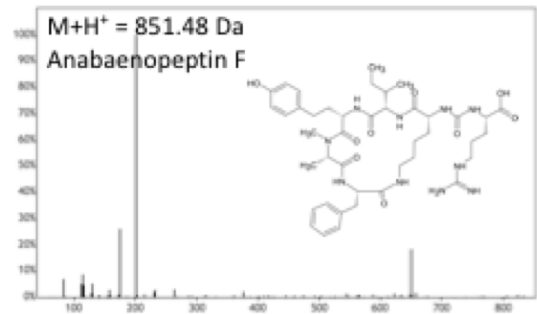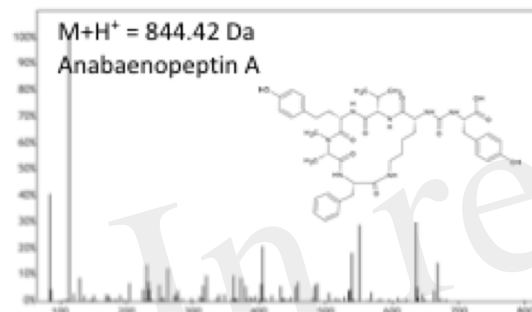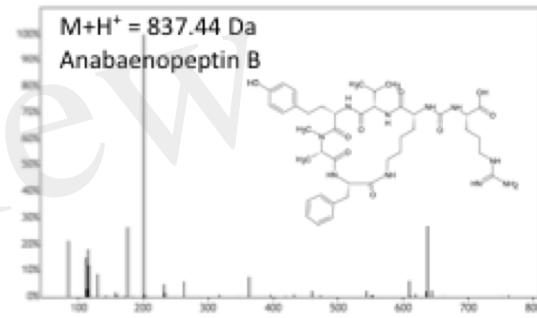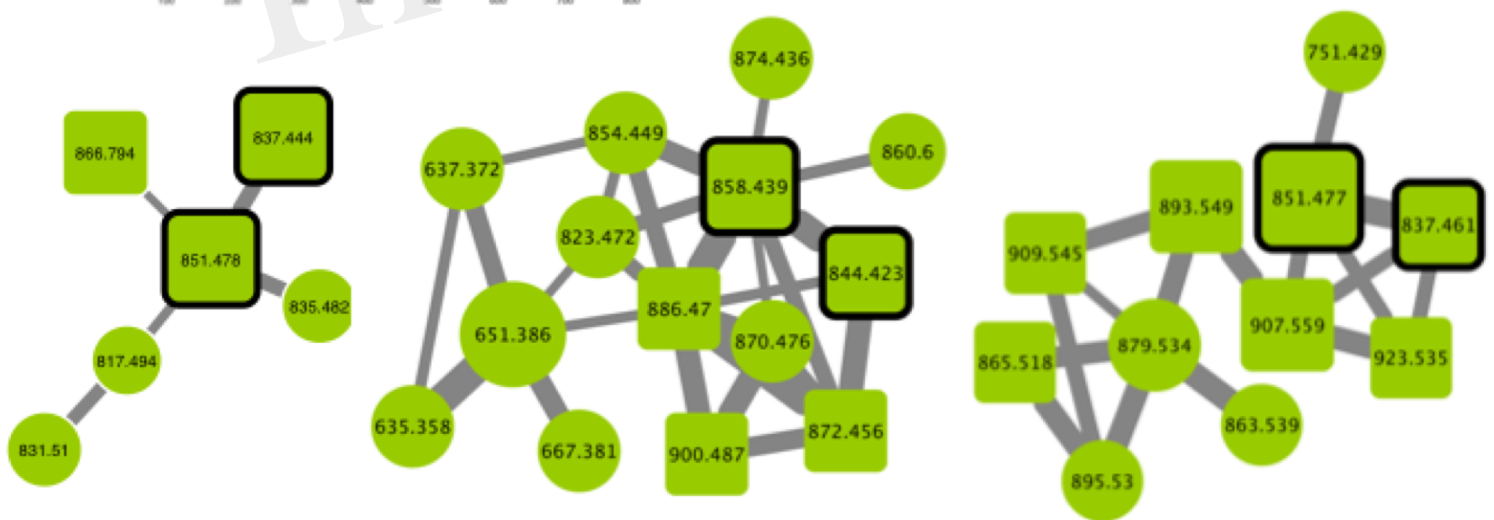

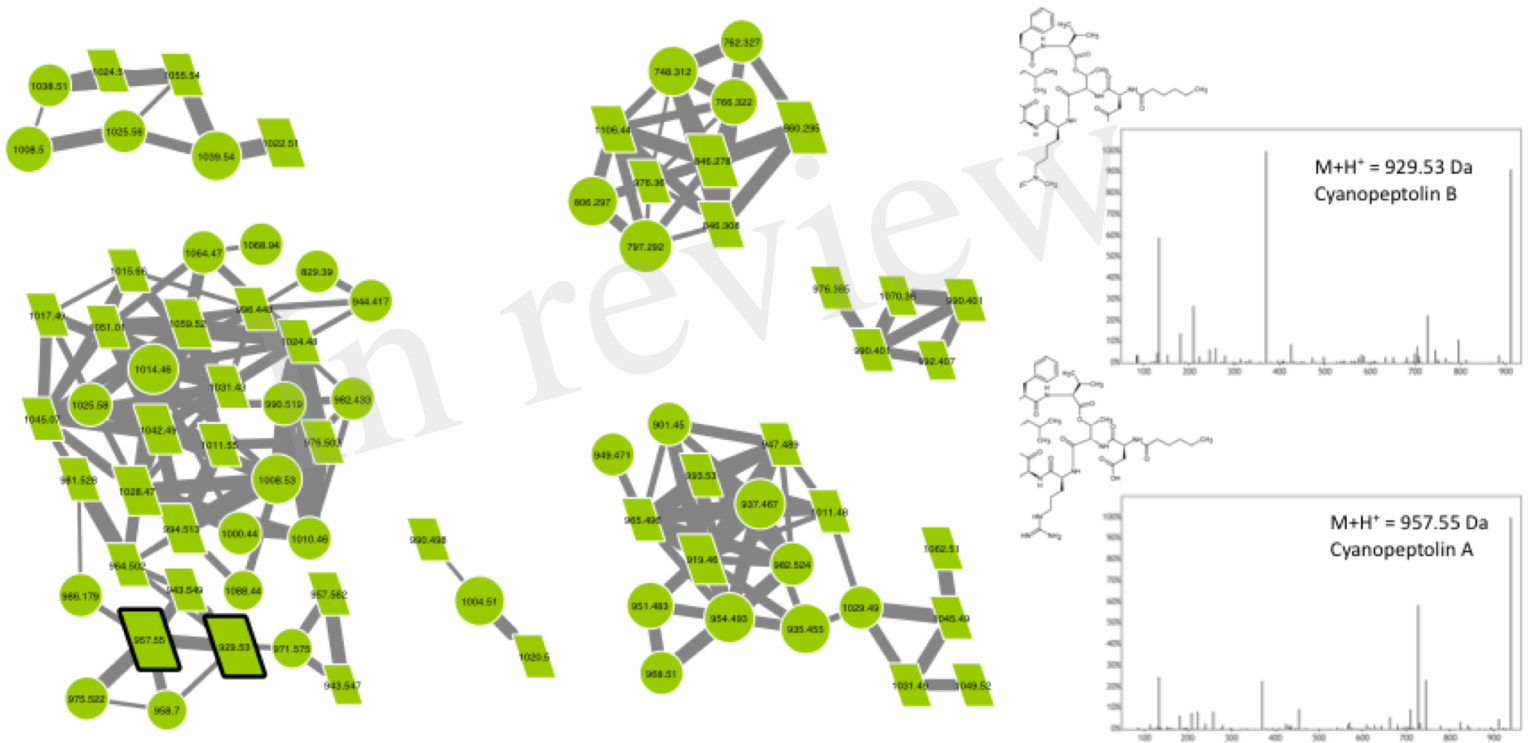

Source: https://www.biorxiv.org/content/10.1101/407189v2.full.pdf
